# Supplementary material for: libmpdata++ 1.0: a library of parallel MPDATA solvers for systems of generalised transport equations
Source: Copernicus journal article supplement (doi:10.5194/gmd-8-1005-2015), 2015-04-08
Supplement: Supplementary file 1 [file gmd-8-1005-2015-supplement-cover-letter.pdf › gmd-8-1005-2015-supplement-cover-letter.pdf]

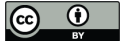

## *Supplement of*

# **libmpdata++ 1.0: a library of parallel MPDATA solvers for systems of generalised transport equations**

**A. Jaruga et al.**

*Correspondence to:* A. Jaruga ([ajaruga@igf.fuw.edu.pl](mailto:ajaruga@igf.fuw.edu.pl)) and H. Pawlowska ([hanna.pawlowska@igf.fuw.edu.pl](mailto:hanna.pawlowska@igf.fuw.edu.pl))

- [gmd-8-1005-2015-supplement-cover-letter.pdf](#)
- [libmpdataxx-1.0.1](#)
  - [.travis.yml](#)
  - [COPYING](#)
  - [CREDITS](#)
  - [README](#)
  - [libmpdata++](#)
    - \* [CMakeLists.txt](#)
    - \* [bcond](#)
    - \* [blitz.hpp](#)
    - \* [concurr](#)
    - \* [formulae](#)
    - \* [git\\_revision.hpp](#)
    - \* [kahan\\_reduction.hpp](#)
    - \* [opts.hpp](#)
    - \* [output](#)
    - \* [solvers](#)
  - [libmpdata++-config.cmake](#)
  - [tests](#)
    - \* [paper\\_2015\\_GMD](#)
    - \* [sandbox](#)
    - \* [unit](#)
